# Supplementary material for: Ensemble machine learning methods: predicting electron stopping powers from a small experimental database
Source: Royal Society of Chemistry journal article supplement (doi:10.1039/d0cp06521h), 2021-01-01
Supplement: d0cp06521h1.pdf [file d0cp06521h1.pdf]

## Ensemble Machine Learning Methods: Predicting Electron Stopping Powers from Small Experimental Database

<sup>1</sup>Mehnaz, <sup>1</sup>L.H. Yang, <sup>2</sup>B. Da#, <sup>1</sup>Z.J. Ding\*

<sup>1</sup>Hefei National Laboratory for Physical Sciences at Microscale and Department of Physics, University of Science and Technology of China, Hefei, Anhui 230026, P.R. China;

<sup>2</sup>Research and Services Division of Materials Data and Integrated System (MaDIS), National Institute for Materials Science (NIMS), 1-2-1 Sengen, Tsukuba, Ibaraki 305-0047, Japan

#e-mail: [DA.Bo@nims.go.jp](mailto:DA.Bo@nims.go.jp)

\*e-mail: [zjding@ustc.edu.cn](mailto:zjding@ustc.edu.cn)

### Supplementary Information

Table S1: Feature importance for tree-based models (RF, DT, GBR) in different energy ranges. In the first column  $E$  denotes the entire energy range in which the experimental data is present.

| Features       | Feature importance for RF |         |           |         |
|----------------|---------------------------|---------|-----------|---------|
|                | E                         | < 1 keV | 1 - 5 keV | > 5 keV |
| Z              | 0.15                      | 0.10    | 0.10      | 0.03    |
| N <sub>s</sub> | 0.01                      | 0.03    | 0.03      | 0.00    |
| N <sub>p</sub> | 0.04                      | 0.03    | 0.03      | 0.03    |
| N <sub>d</sub> | 0.01                      | 0.03    | 0.03      | 0.03    |
| N <sub>f</sub> | 0.01                      | 0.03    | 0.02      | 0.04    |
| N <sub>v</sub> | 0.12                      | 0.16    | 0.11      | 0.12    |
| N <sub>c</sub> | 0.12                      | 0.13    | 0.10      | 0.09    |
| P              | 0.11                      | 0.13    | 0.09      | 0.03    |
| G              | 0.04                      | 0.03    | 0.01      | 0.02    |
| n              | 0.01                      | 0.02    | 0.04      | 0.03    |
| ρ              | 0.5                       | 0.46    | 0.53      | 0.47    |
| A              | 0.17                      | 0.14    | 0.18      | 0.19    |
| R              | 0.61                      | 0.51    | 0.60      | 0.45    |
| ρZ             | 0.43                      | 0.31    | 0.39      | 0.38    |
| iEA            | 0.35                      | 0.33    | 0.41      | 0.39    |

| Features       | Feature Importance for DT |         |           |         |
|----------------|---------------------------|---------|-----------|---------|
|                | E                         | < 1 keV | 1 - 5 keV | > 5 keV |
| Z              | 0.14                      | 0.24    | 0.15      | 0.12    |
| N <sub>s</sub> | 0.03                      | 0.03    | 0.02      | 0.03    |
| N <sub>p</sub> | 0.01                      | 0.01    | 0.01      | 0.01    |
| N <sub>d</sub> | 0.08                      | 0.09    | 0.08      | 0.08    |
| N <sub>f</sub> | 0                         | 0.00    | 0.00      | 0.00    |
| N <sub>v</sub> | 0.12                      | 0.13    | 0.11      | 0.16    |
| N <sub>c</sub> | 0.01                      | 0.01    | 0.01      | 0.01    |
| P              | 0.98                      | 0.73    | 0.81      | 0.80    |
| G              | 0.32                      | 0.23    | 0.33      | 0.35    |
| n              | 0                         | 0.00    | 0.00      | 0.00    |
| ρ              | 0.53                      | 0.39    | 0.42      | 0.55    |
| A              | 0.24                      | 0.25    | 0.25      | 0.25    |
| R              | 0.23                      | 0.38    | 0.32      | 0.43    |
| ρZ             | 0.11                      | 0.10    | 0.10      | 0.07    |
| iEA            | 0.14                      | 0.30    | 0.37      | 0.28    |

  

| Features       | Feature Importance for GBR |         |           |         |
|----------------|----------------------------|---------|-----------|---------|
|                | E                          | < 1 keV | 1 - 5 keV | > 5 keV |
| Z              | 0.16                       | 0.13    | 0.18      | 0.11    |
| N <sub>s</sub> | 0.01                       | 0.01    | 0.02      | 0.03    |
| N <sub>p</sub> | 0.09                       | 0.10    | 0.08      | 0.11    |
| N <sub>d</sub> | 0.00                       | 0.00    | 0.00      | 0.01    |
| N <sub>f</sub> | 0.00                       | 0.00    | 0.01      | 0.01    |
| N <sub>v</sub> | 0.01                       | 0.02    | 0.01      | 0.02    |
| N <sub>c</sub> | 0.36                       | 0.36    | 0.32      | 0.42    |
| P              | 0.03                       | 0.05    | 0.07      | 0.06    |
| G              | 0.03                       | 0.05    | 0.03      | 0.04    |
| n              | 0.01                       | 0.01    | 0.02      | 0.02    |
| ρ              | 0.48                       | 0.45    | 0.46      | 0.52    |
| A              | 0.23                       | 0.25    | 0.23      | 0.27    |
| R              | 0.43                       | 0.39    | 0.44      | 0.42    |
| ρZ             | 0.49                       | 0.45    | 0.48      | 0.45    |
| iEA            | 0.29                       | 0.30    | 0.30      | 0.30    |

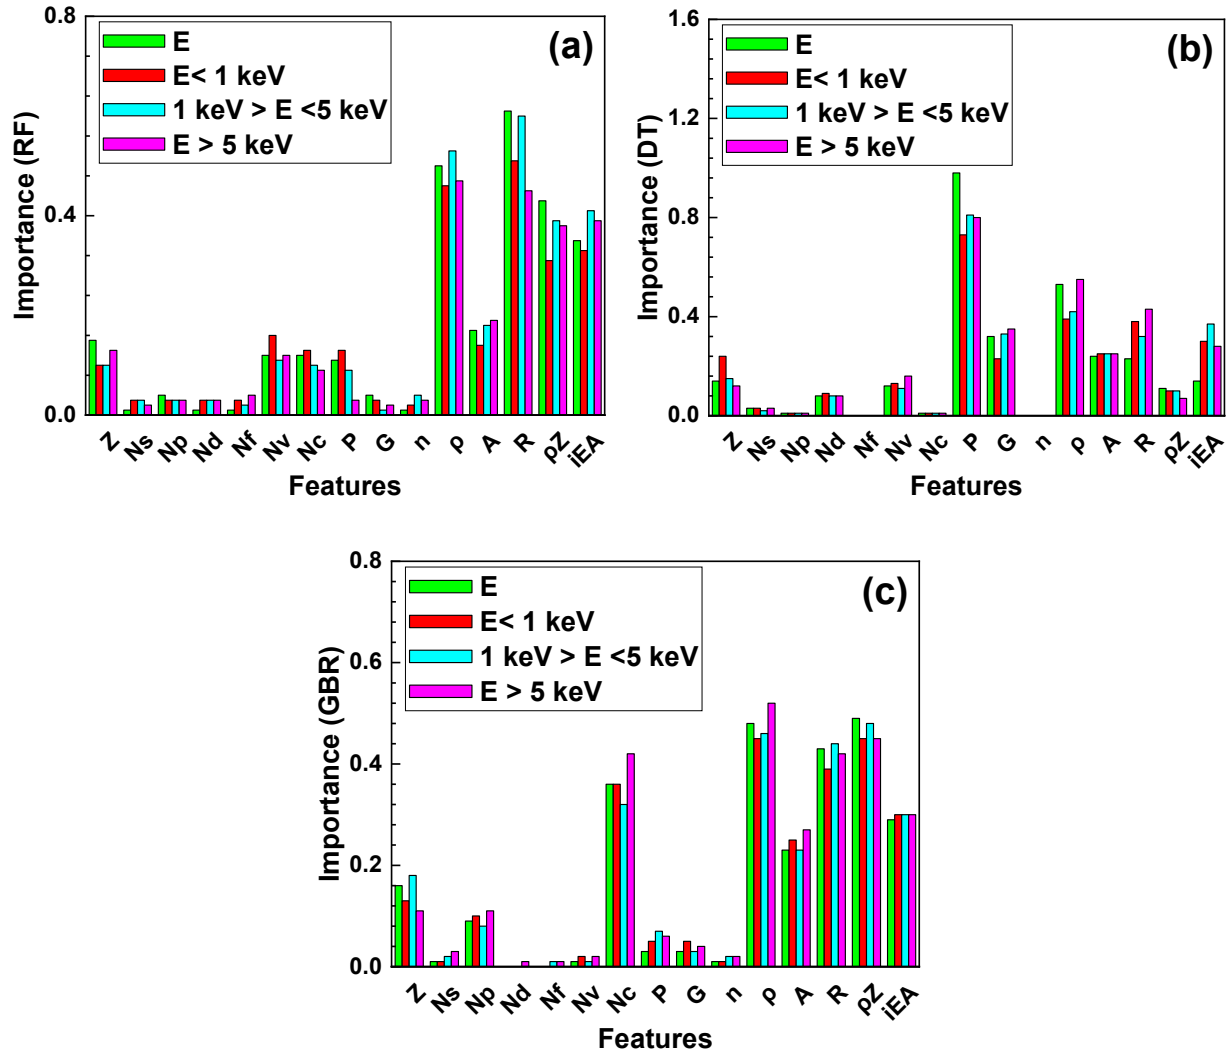

Figure S1: Feature importance for tree-based models over various energy ranges: (a) for RF (b) DTs and (c) GBR. The green color shows the entire energy range for which the experimental data are available.
